# Supplementary material for: Tumour characteristics and survivorship in a cohort of breast cancer: the MCC-Spain study
Source: PubMed Central journal article supplement (PMC7220874; doi:10.1007/s10549-020-05600-x), 2020-04-30

**Supplementary table 1. Main characteristics of the patients. Sample description.**

| <b>Variable</b>                           | <b>Category</b>                 | <b>N(%)</b> |
|-------------------------------------------|---------------------------------|-------------|
| <b>Age</b>                                | <b>(mean±sd)</b>                | 56.5(12.6)  |
| <b>Age</b>                                | <b>&lt;45 years</b>             | 352(20)     |
|                                           | <b>45 – 54 years</b>            | 456(26)     |
|                                           | <b>55 – 64 years</b>            | 463(27)     |
|                                           | <b>65 – 74 years</b>            | 289(17)     |
|                                           | <b>≥75 years</b>                | 178(10)     |
| <b>Educational level</b>                  | <b>Less than primary school</b> | 270(16)     |
|                                           | <b>Primary school</b>           | 563(32)     |
|                                           | <b>Secondary school</b>         | 574(33)     |
|                                           | <b>University</b>               | 331(19)     |
| <b>Menopausal status</b>                  | <b>Premenopausal</b>            | 612(35)     |
|                                           | <b>Postmenopausal</b>           | 1125(65)    |
| <b>Smoking</b>                            | <b>Never smoker</b>             | 970(56)     |
|                                           | <b>Former smoker</b>            | 286(17)     |
|                                           | <b>Current smoker</b>           | 469(27)     |
| <b>Body Mass Index (kg/m<sup>2</sup>)</b> | <b>&lt;18.5</b>                 | 28(1.7)     |
|                                           | <b>18.5 – 24.9</b>              | 745(46)     |
|                                           | <b>25.0 – 29.9</b>              | 542(34)     |
|                                           | <b>≥30.0</b>                    | 293(18)     |

**Supplementary table 2. Pathologic prognostic score relation with survival in women without neoadjuvant therapy by menopausal status. Hazard ratios and 95% confidence intervals estimated via Weibull regression**

| PPS         | Premenopausal |                        |       | Postmenopausal |                        |       |
|-------------|---------------|------------------------|-------|----------------|------------------------|-------|
|             | N (%)         | Hazard ratio (95% CI)* | p     | N (%)          | Hazard ratio (95% CI)* | p     |
| <b>0</b>    | 23 (5.64)     | NA                     | NA    | 60(9.54)       | 0.42 (0.06 to 3.26)    | 0.410 |
| <b>IA</b>   | 226(55.39)    | 1 (ref)                |       | 367(58.35)     | 1 (ref)                |       |
| <b>IB</b>   | 66(16.18)     | 3.18 (0.55 to 18.5)    | 0.198 | 82(13.04)      | 2.34 (1.01 to 5.43)    | 0.047 |
| <b>IIA</b>  | 31(7.60)      | 8.42 (1.55 to 45.7)    | 0.014 | 40(6.36)       | 3.08 (1.18 to 8.06)    | 0.022 |
| <b>IIB</b>  | 15(3.68)      | 5.20 (0.47 to 57.1)    | 0.178 | 29(4.61)       | 3.67 (1.23 to 11.0)    | 0.020 |
| <b>IIIA</b> | 25(6.13)      | 18.3 (3.28 to 101.8)   | 0.001 | 18(2.86)       | 5.45 (1.87 to 15.9)    | 0.002 |
| <b>IIIB</b> | 6(1.48)       | 13.7 (1.29 to 145.2)   | 0.030 | 13(2.07)       | NA                     | NA    |
| <b>IIIC</b> | 2(0.49)       | NA                     | NA    | 4(0.64)        | 11.5 (1.17 to 113.6)   | 0.036 |
| <b>IV</b>   | 14(3.43)      | 139.3 (24.3 to 799.0)  | 0.000 | 16(2.54)       | 39.6 (14.8 to 105.9)   | 0.000 |

\*Adjusted for age at diagnosis and hospital

NA = Not Available/Not Applicable

Sup. Fig. 1

(a)

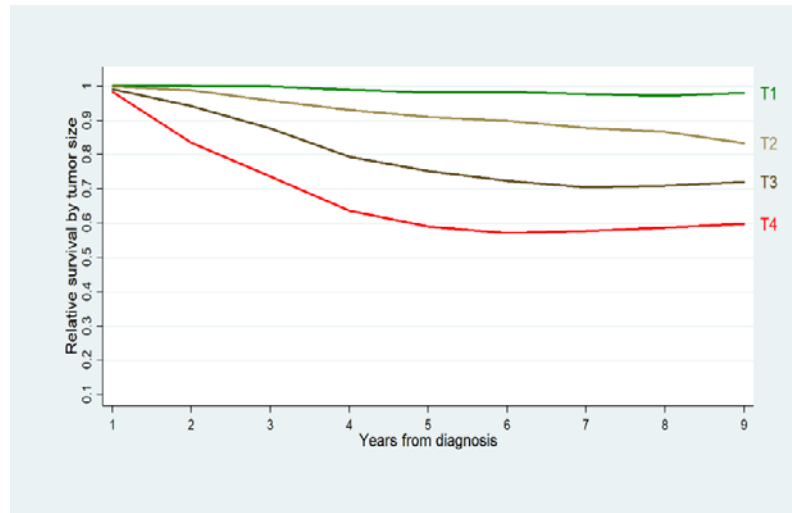

(b)

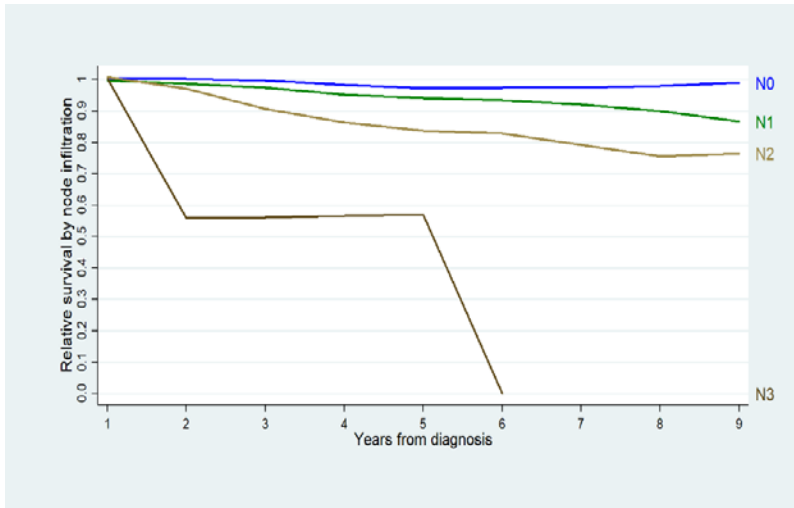

(c)

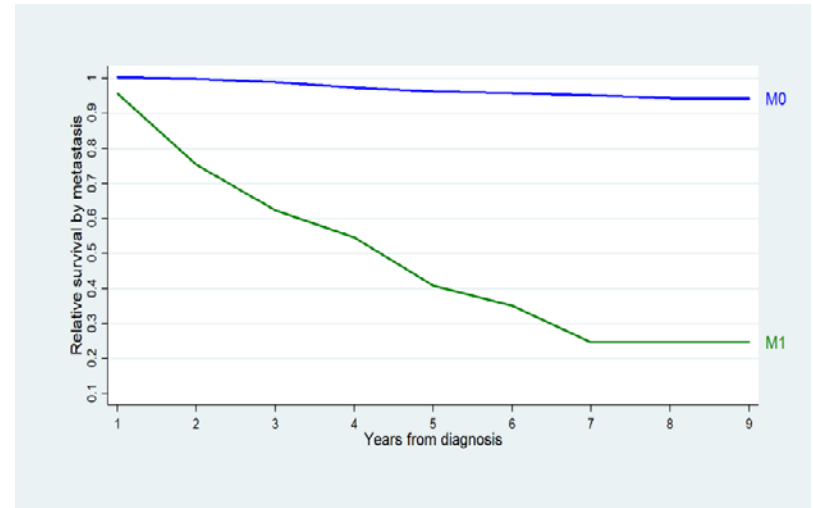

Sup. Fig. 2

(a)

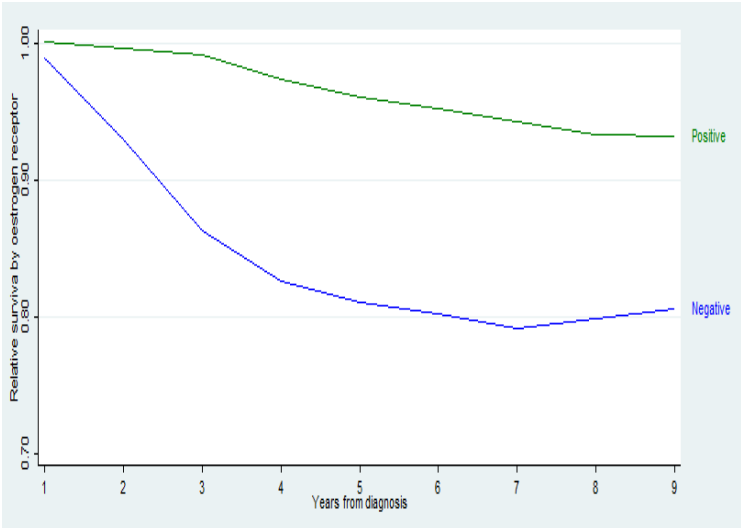

(b)

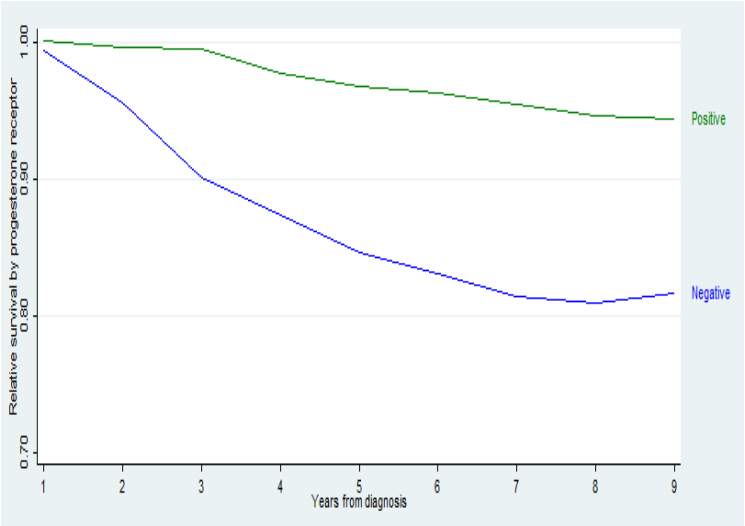

(c)

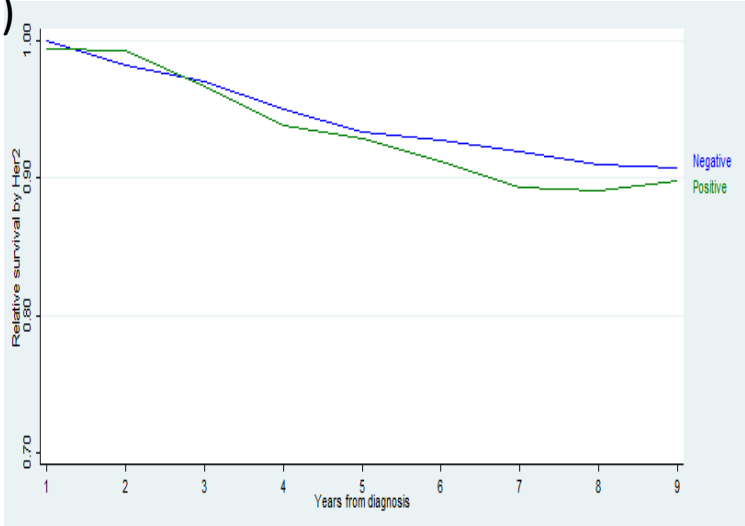

Supplement: 10549_2020_5600_MOESM1_ESM.pdf [file 10549_2020_5600_MOESM1_ESM.pdf]
